# Supplementary material for: Reversible piezofluorochromism of a triphenylamine-based benzothiazole derivative with a strong fluorescence response to volatile acid vapors
Source: Royal Society of Chemistry journal article supplement (doi:10.1039/c6nj02735k), 2016-11-21
Supplement: c6nj02735k1.pdf [file c6nj02735k1.pdf]

**Supporting Information for**  
**Reversible piezofluorochromism of triphenylamine-based**  
**benzothiazole derivative with strong fluorescence response to volatile**  
**acid vapors**

Yong Zhan\*, Peng Yang, Gang Li, Yuanyuan Zhang, Ying Bao.

*Key Laboratory of Structure-Based Drug Design and Discovery of Ministry of  
Education, Shenyang Pharmaceutical University, Shenyang, 110016, P. R. China*

E-mail: [zhanyong2046@126.com](mailto:zhanyong2046@126.com).

Tel: +86-024-23986449

**Table S1.** Photophysical data of **TVBT** in different solvents.

| solvent      | $\lambda_{\text{abs}}$ (nm) | $\epsilon^{\text{max}}$ ( $\text{M}^{-1} \text{cm}^{-1}$ ) <sup>a</sup> | $\lambda_{\text{em}}$ (nm) | Stokes shift ( $\text{cm}^{-1}$ ) | $\Phi_{\text{F}}$ <sup>b</sup> |
|--------------|-----------------------------|-------------------------------------------------------------------------|----------------------------|-----------------------------------|--------------------------------|
| Cyclohexane  | 306, 395                    | 33200                                                                   | 442, 470                   | 2692                              | 0.98                           |
| Toluene      | 308, 399                    | 33600                                                                   | 467                        | 3649                              | 0.78                           |
| THF          | 306, 400                    | 38950                                                                   | 509                        | 5354                              | 0.70                           |
| DCM          | 308, 400                    | 36250                                                                   | 522                        | 5843                              | 0.52                           |
| DMF          | 308, 401                    | 39100                                                                   | 547                        | 6656                              | 0.32                           |
| Acetonitrile | 304, 395                    | 37400                                                                   | 547                        | 7035                              | 0.31                           |

<sup>a</sup> The maximum molar absorption coefficient in different solution ( $1.0 \times 10^{-5}$  M). <sup>b</sup> The fluorescence quantum yields ( $\Phi_{\text{F}}$ ) of **TVBT** were measured using 9,10-diphenylanthracene in benzene ( $\Phi_{\text{F}} = 0.85$ ) as standard.

**Table S2.** Crystal data for TVBT.

| Compound                                               | TVBT                                              |
|--------------------------------------------------------|---------------------------------------------------|
| Chemical formula                                       | C <sub>33</sub> H <sub>24</sub> N <sub>2</sub> S  |
| Formula weight                                         | 480.60                                            |
| Temperature (K)                                        | 273 (2)                                           |
| Wavelength (Å)                                         | 0.71073                                           |
| Color                                                  | colorless                                         |
| Crystal system                                         | triclinic                                         |
| Space group                                            | $P\bar{1}$                                        |
| a (Å)                                                  | 10.1930 (6)                                       |
| b (Å)                                                  | 10.5329 (6)                                       |
| c (Å)                                                  | 26.0752 (18)                                      |
| $\alpha$ (°)                                           | 85.312 (4)                                        |
| $\beta$ (°)                                            | 82.900 (4)                                        |
| $\gamma$ (°)                                           | 64.441 (4)                                        |
| Volume (Å <sup>3</sup> )                               | 2504.9 (3)                                        |
| Z                                                      | 4                                                 |
| Density (calculated, g·cm <sup>-3</sup> )              | 1.274                                             |
| F (000)                                                | 1008                                              |
| Absorption coefficient (mm <sup>-1</sup> )             | 0.154                                             |
| □ range for data collection (°)                        | 2.144 / 24.710                                    |
| Index ranges (h, k, l)                                 | -11/11, -12/12, -22/30                            |
| Measured reflections                                   | 16065                                             |
| Independent reflections                                | 2016                                              |
| R <sub>int</sub>                                       | 0.0327                                            |
| Observed reflections [I > 2σ (I)]                      | 4313                                              |
| Data / restraints / parameters                         | 8515 / 24 / 656                                   |
| Goodness-of-fit on F <sup>2</sup>                      | 1.028                                             |
| R indices (all data)                                   | R <sub>1</sub> = 0.1347, wR <sub>2</sub> = 0.1989 |
| R indices [I > 2σ (I)]                                 | R <sub>1</sub> = 0.0656, wR <sub>2</sub> = 0.1578 |
| Largest diffraction peak and hole (e·Å <sup>-3</sup> ) | 0.536 and -0.388                                  |

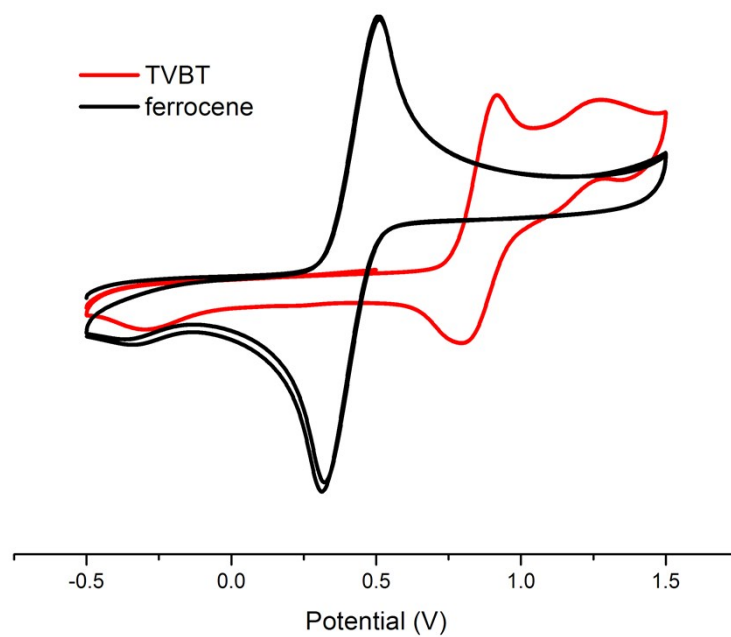

**Fig. S1** Cyclic voltammetry diagrams of compounds **TVBT** and ferrocene measured in anhydrous DCM with  $\text{Bu}_4\text{NPF}_6$  (0.1 M) as electrolyte at a scan rate of 100 mV/s.

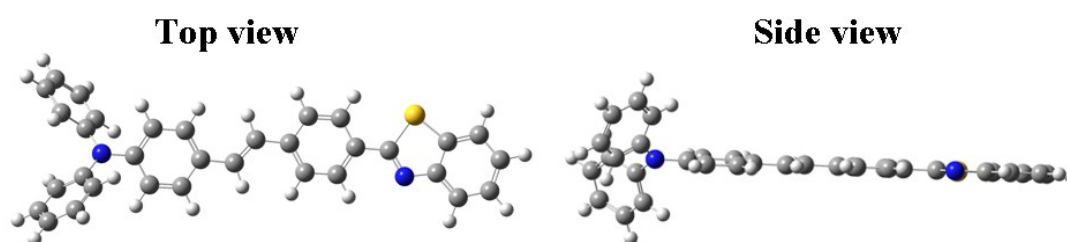

**Fig. S2** Optimal molecular conformations by the DFT/B3LYP/6-31G(d) calculation.

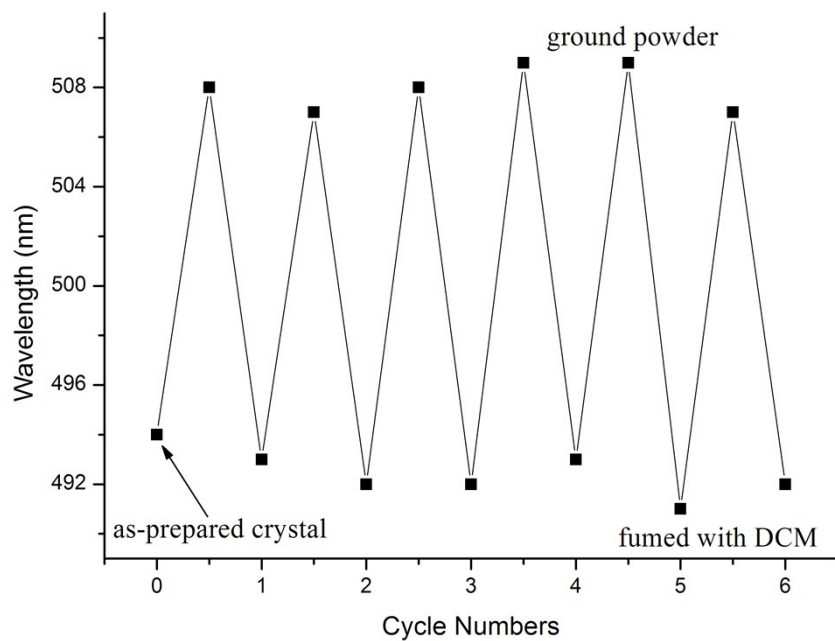

**Fig. S3** Maximum fluorescence emission of TVBT upon repeating treated by grinding and fuming with DCM.

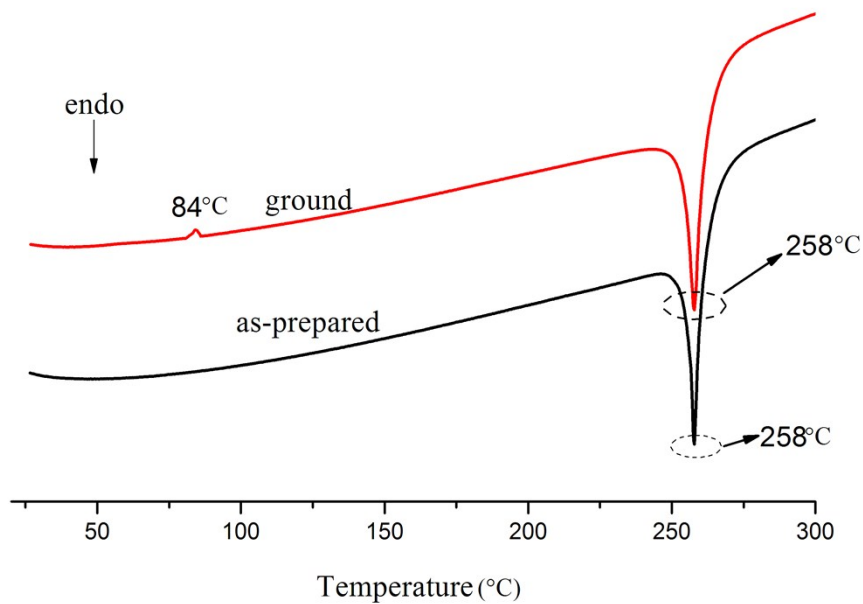

**Fig. S4** DSC curves for the as-prepared crystal and ground powder of TVBT under nitrogen atmosphere at a heating rate of 10 °C/min.

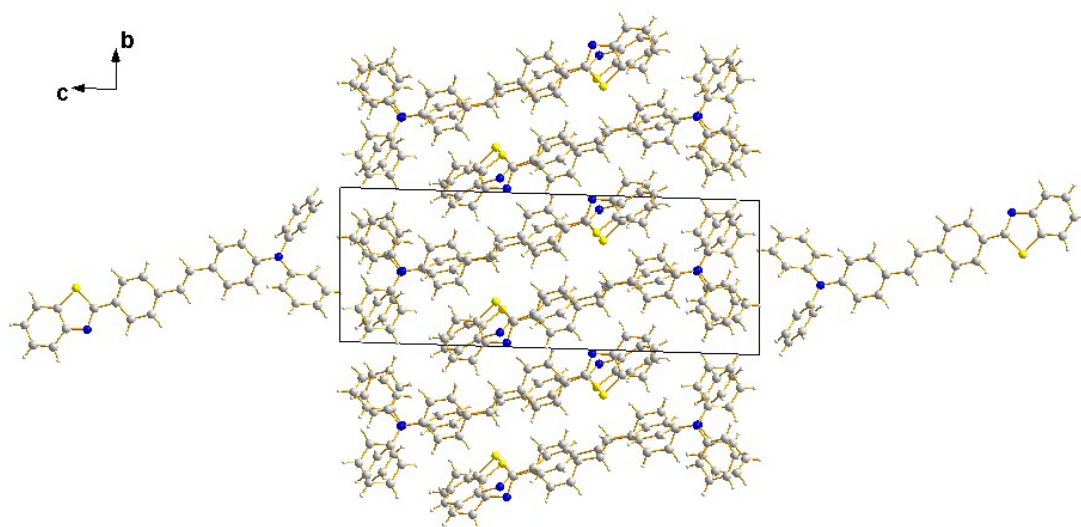

**Fig. S5** Molecular packing diagram of **TVBT** in single crystal.

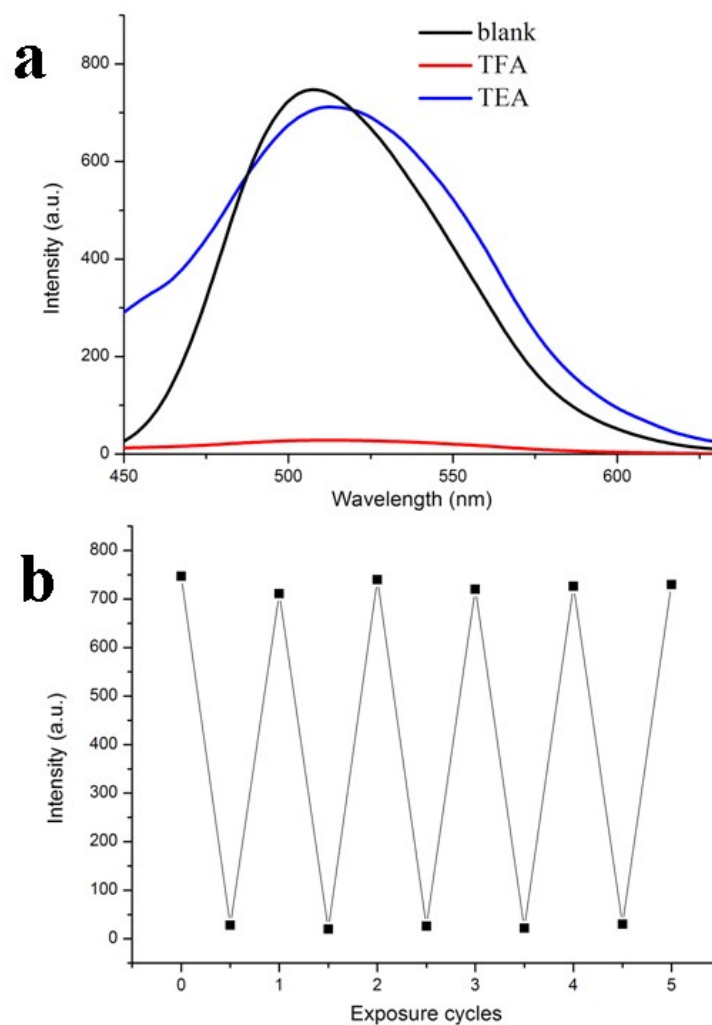

**Fig. S6** (a) Fluorescence spectral change of **TVBT** in CHCl<sub>3</sub> ( $5.0 \times 10^{-5}$  M) with additional 150 equiv TFA and TEA at room temperature ( $\lambda_{\text{ex}} = 400$  nm); (b) Reversible fluorescence emission intensity in CHCl<sub>3</sub> of **TVBT** upon additional equivalent TFA and TEA.

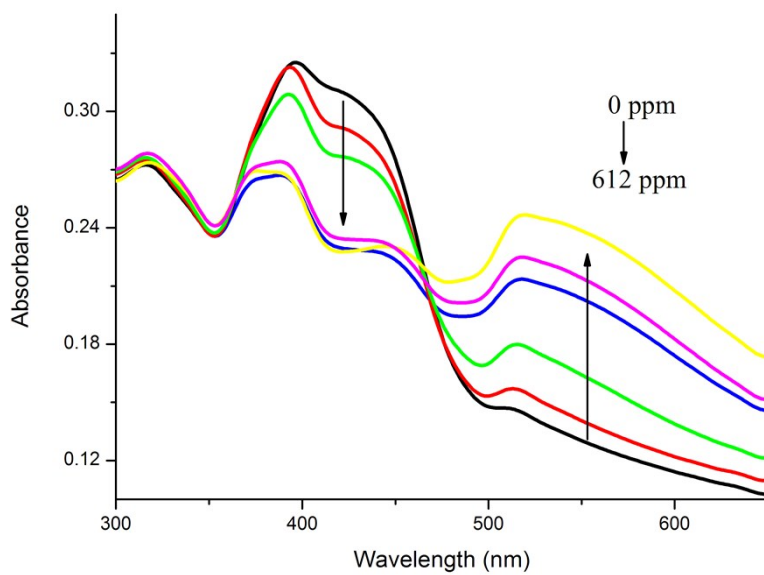

**Fig. S7** UV-vis absorption spectra of the ground film of TVBT upon exposure to different amounts of TFA vapor.

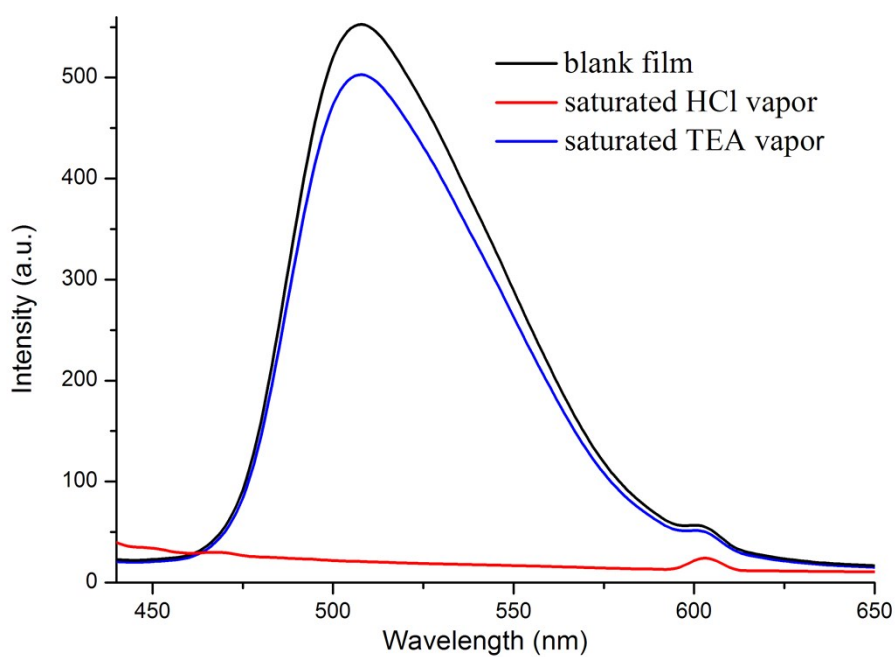

**Fig. S8** Fluorescence spectral change of the ground film of TVBT upon exposure to saturated HCl and TFA vapors.



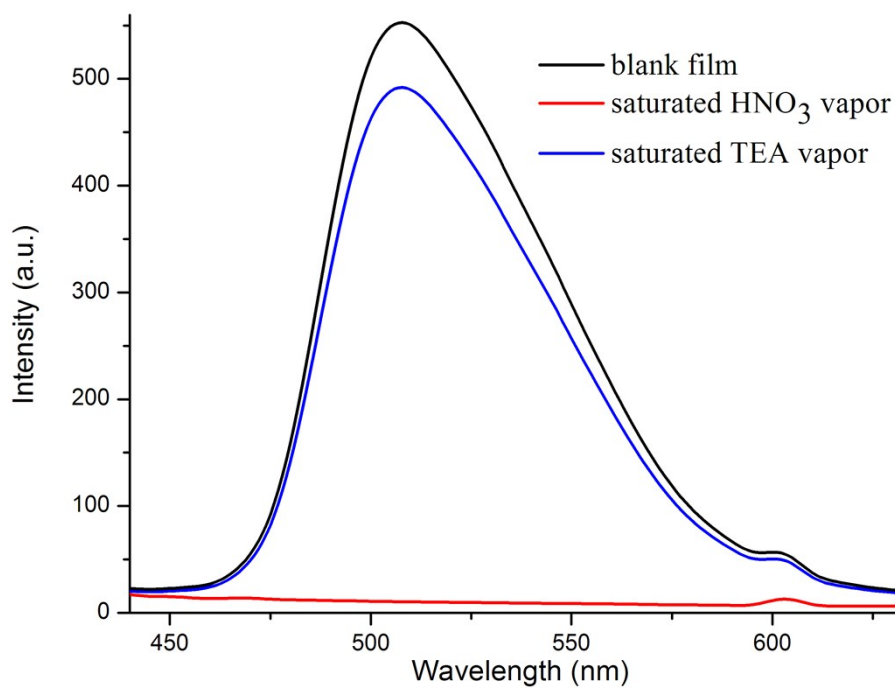

**Fig. S9** Fluorescence spectral change of the ground film of **TVBT** upon exposure to saturated HNO<sub>3</sub> and TFA vapors.

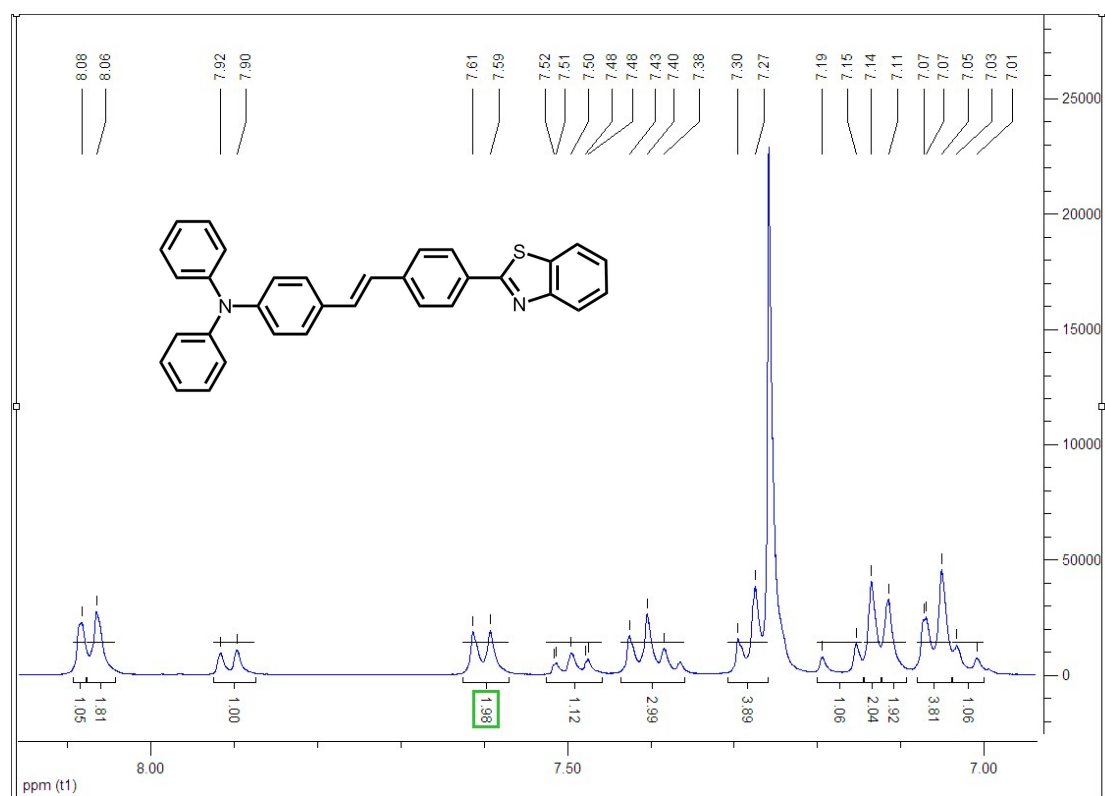

**Fig. S10** <sup>1</sup>H-NMR (400 MHz, CDCl<sub>3</sub>) spectrum of compound **TVBT**.

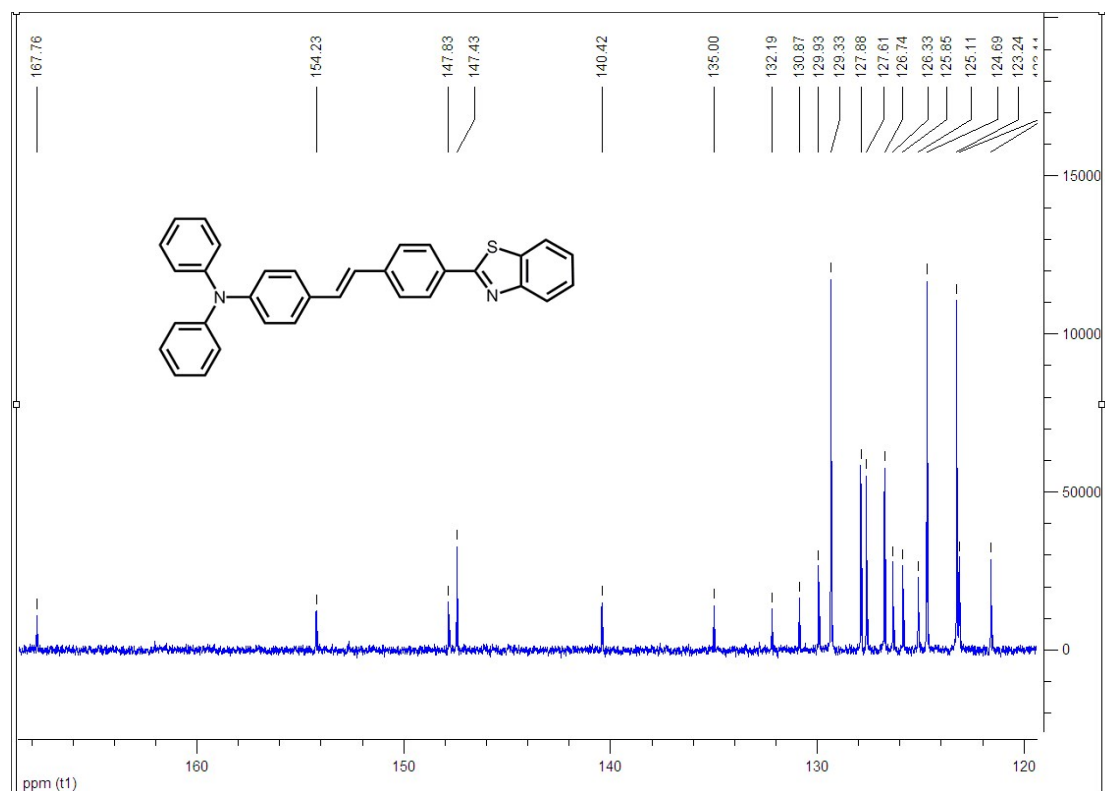

**Fig. S11**  $^{13}\text{C}$ -NMR (100 MHz,  $\text{CDCl}_3$ ) spectrum of compound TVBT.

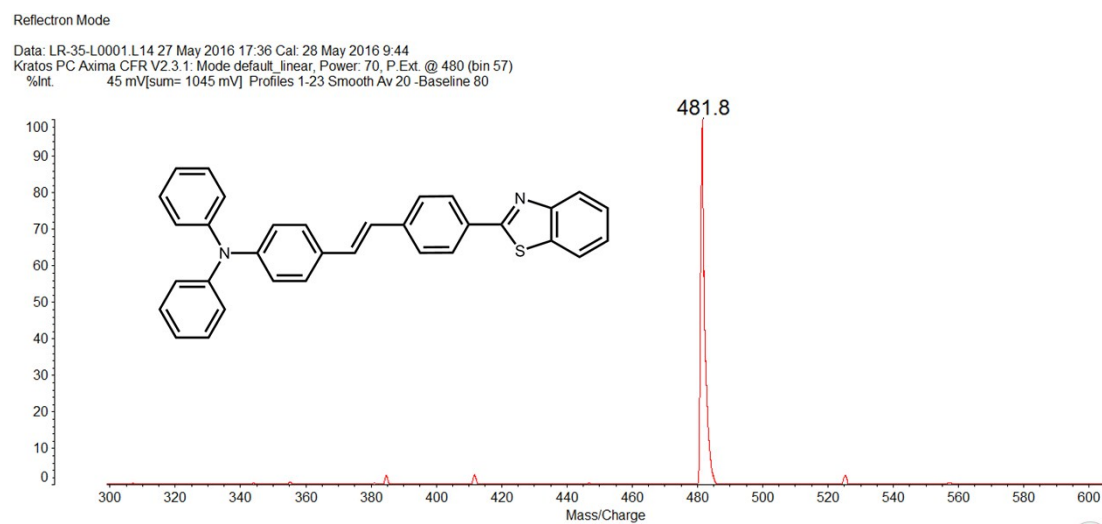

**Fig. S12** The MALDI/TOF MS spectrum of compound TVBT.
